# Supplementary material for: Evaluation of terrestrial pan-Arctic carbon cycling using a data-assimilation system
Source: Copernicus journal article supplement (doi:10.5194/esd-2018-19), 2018-05-22
Supplement: Supplementary file 1 [file esd-2018-19-supplement.pdf]

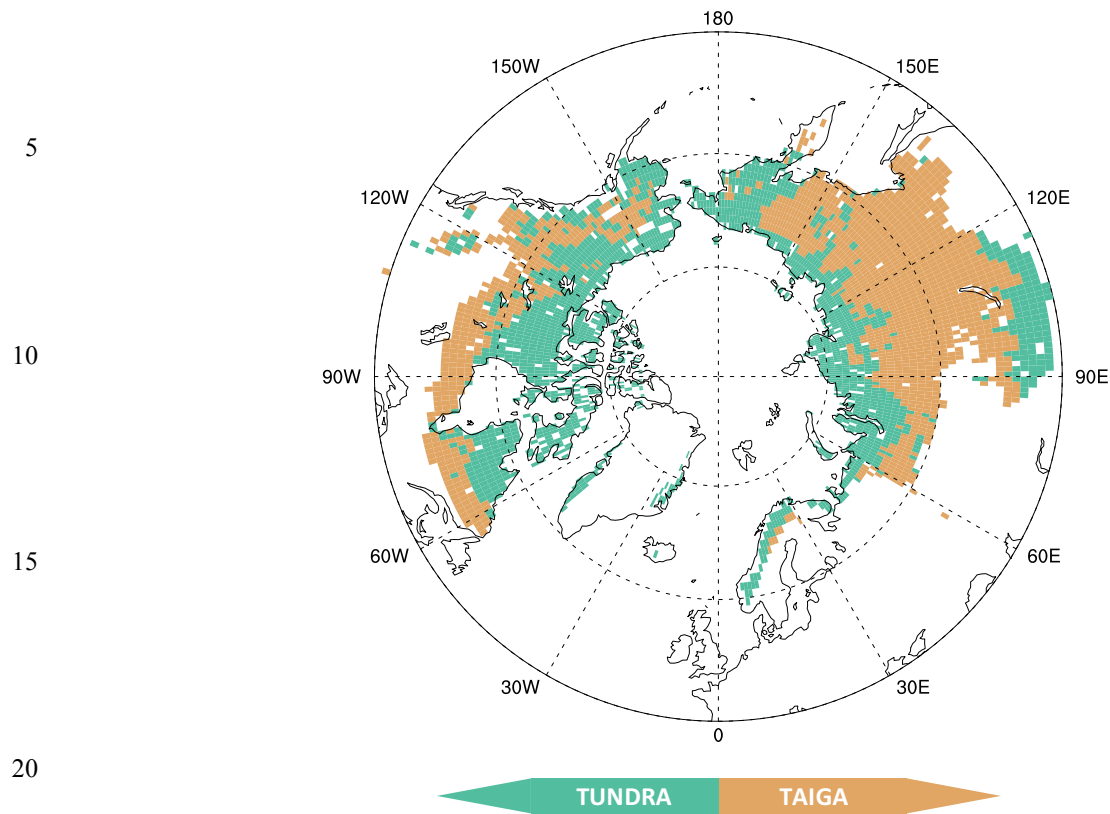

Figure S1. Spatial domain defined by the Northern Circumpolar Soil Carbon Database version 2 (NCSCDv2) region. The tundra-taiga regions were separated based on the presence-absence of forested areas using the GlobCover map ([http://due.esrin.esa.int/page\\_globcover.php](http://due.esrin.esa.int/page_globcover.php)). Forested areas included: closed to open broadleaved evergreen or semi-deciduous forest (>5m), closed (>40%) broadleaved deciduous forest (>5m), open (15-40%) broadleaved deciduous forest/woodland (>5m), closed (>40%) needleleaved evergreen forest (>5m), open (15-40%) needleleaved deciduous or evergreen forest (>5m) and closed to open (>15%) mixed broadleaved and needleleaved forest (>5m).

Table S1. DALEC2 model parameter description, and prior ranges based on ecologically viable limits.

| Process           | Parameter                              | Prior range     | Units                  |
|-------------------|----------------------------------------|-----------------|------------------------|
| Plant phenology   | Leaf onset day                         | 1-365           | day                    |
|                   | Leaf fall leaf                         | 1-365           | day                    |
|                   | Leaf fall period                       | 20-150          | day                    |
|                   | Labile C release period                | 10-100          | day                    |
|                   | Canopy efficiency                      | 5.0-50          |                        |
|                   | Leaf mass per area                     | 5-200           | g C m <sup>-2</sup>    |
| Allocation of NPP | Fraction of GPP respired               | 0.3-0.7         |                        |
|                   | Fraction of NPP to foliage C pool      | 0.01-1          |                        |
|                   | Fraction of NPP to labile C pool       | 0.01-1          |                        |
|                   | Fraction of NPP to roots C pool        | 0.01-1          |                        |
| C pools           | Foliar C pool                          | 20-2000         | g C m <sup>-2</sup> yr |
|                   | Labile C pool                          | 20-2000         | g C m <sup>-2</sup> yr |
|                   | Woody C pool                           | 100-100000      | g C m <sup>-2</sup> yr |
|                   | Fine root C pool                       | 20-2000         | g C m <sup>-2</sup> yr |
|                   | Litter C pool                          | 20-2000         | g C m <sup>-2</sup> yr |
|                   | Soil organic matter C pool             | 100-200000      | g C m <sup>-2</sup> yr |
| Turnover rates    | Lifespan                               | 1.001-8         |                        |
|                   | Wood turnover                          | 0.000025-0.001  | /day                   |
|                   | Root turnover                          | 0.0001-0.01     | /day                   |
|                   | Litter mineralization                  | 0.0001-0.01     | /day                   |
|                   | Soil organic matter mineralization     | 0.0000001-0.001 | /day                   |
|                   | Decomposition rate                     | 0.00001-0.01    | /day                   |
|                   | Temperature dependence exponent factor | 0.018-0.08      |                        |

35 Table S2. Data set description of the 8 selected sites derived from the FLUXNET2015 database. MAT stands for Mean Annual Temperature while MAP for Mean Annual Precipitation.

| Site ID           | DK-NuF    | DK-ZaH            | RU-Ha1         | US-Prr               | CA-Man               | CA-NS7             | RU-Sam    | RU-Tks     |
|-------------------|-----------|-------------------|----------------|----------------------|----------------------|--------------------|-----------|------------|
| Site Name         | Nuuk Fen  | Zackenbergh Heath | Hakasia steppe | Poker Flat           | Manitoba             | UCI-1998 burn site | Samoylov  | Tiksi      |
| Latitude          | 64.1      | 74.5              | 54.7           | 65.1                 | 55.9                 | 56.6               | 72.4      | 71.6       |
| Longitude         | -51.4     | -20.6             | 90.0           | -147.5               | -98.5                | -99.9              | 126.5     | 128.9      |
| MAT (°C)          | -1.4      | -9.0              | -              | -2.0                 | -3.2                 | -3.5               | -         | -12.7      |
| MAP (mm)          | 750.0     | 211.0             | -              | 275.0                | 520.0                | 483.0              | -         | 323.0      |
| Eco-type (IGBP)   | Wetland   | Heathland         | Grasslands     | Evergreen Needleleaf | Evergreen Needleleaf | Open shrubland     | Grassland | Grasslands |
| Tundra-Taiga      | Tundra    | Tundra            | Tundra         | Taiga                | Taiga                | Taiga              | Tundra    | Tundra     |
| Data availability | 2008-2015 | 2000-2014         | 2002-2004      | 2010-2014            | 1994-2008            | 2002-2005          | 2002-2014 | 2010-2014  |

Table S3. General properties of the global vegetation models used in this study (derived from Nishima et al. 2014 and 2015).

| GVM     | Vegetation | Number of PFT | Nitrogen | Fire | Permafrost | Soil depth | Soil temperature function | Soil moisture function | Reference               |
|---------|------------|---------------|----------|------|------------|------------|---------------------------|------------------------|-------------------------|
| HYBRID4 | DGVM       | 6             | Yes      | No   | No         | -          | Exponential with optimum  | Optimum curve          | Friend and White (2000) |
| JeDi    | DGVM       | 15            | No       | No   | No         | > 5 m      | Exponential (Q10: 1.4)    | -                      | Pavlick et al. (2013)   |
| JULES   | DGVM       | 5             | No       | No   | Yes        | -          | Exponential (Q10: 2.0)    | Linear with plateau    | Clark et al. (2011)     |
| LPJml   | DGVM       | 10            | No       | Yes  | Yes        | 3 m        | Lloyd & Taylor            | Linear with plateau    | Sitch et al. (2003)     |
| SDGVM   | Fixed PFT  | 7             | Yes      | Yes  | No         | 1 m        | Optimum curve             | Optimum curve          | Woodward et al. (1995)  |
| VISIT   | Fixed PFT  | 16            | No       | Yes  | No         | 1 m        | Lloyd & Taylor            | Optimum curve          | Ito and Inatomi (2012)  |

Table S4. Information about the 4 different scenarios used in the sensitivity analysis, using HWSD soil database with and without biomass, and NCSCD with and without biomass. We report C fluxes [NBE, Net Biome Exchange; NPP, Net Primary Production; R<sub>h</sub>, heterotrophic Respiration], C pools [C<sub>photo</sub>, C<sub>veg</sub>, C<sub>dom</sub>, C<sub>tot</sub>] and transit times [TT<sub>photo</sub>, TT<sub>veg</sub>, TT<sub>dom</sub>, TT<sub>tot</sub>]. The averages contain the estimations between the 5th and 95th percentiles, and the median in bold (50<sup>th</sup> percentile).

|               |                     | HWSD         |                |         |                 |                |         | NCSCD        |                |         |                 |                |         |
|---------------|---------------------|--------------|----------------|---------|-----------------|----------------|---------|--------------|----------------|---------|-----------------|----------------|---------|
|               |                     | With biomass |                |         | Without biomass |                |         | With biomass |                |         | Without biomass |                |         |
|               |                     | P05          | P50            | P95     | P05             | P50            | P95     | P05          | P50            | P95     | P05             | P50            | P95     |
| C fluxes      | NBE                 | -261         | <b>-62</b>     | 894.6   | -267.5          | <b>-98.2</b>   | 924.9   | -258.2       | <b>-52.2</b>   | 1158.6  | -266.5          | <b>-89.9</b>   | 1165.7  |
|               | NPP                 | 176.8        | <b>262.3</b>   | 376.1   | 158.6           | <b>242.3</b>   | 355.5   | 177.5        | <b>263.5</b>   | 377.6   | 159.8           | <b>244</b>     | 357.2   |
|               | R <sub>h</sub>      | 26.6         | <b>193.9</b>   | 1162.9  | 19.3            | <b>131.6</b>   | 1164.4  | 29           | <b>206</b>     | 1428.4  | 20.6            | <b>141.6</b>   | 1407.1  |
| C pools       | C <sub>photo</sub>  | 63.1         | <b>118.9</b>   | 223.1   | 150.3           | <b>562.5</b>   | 1653    | 63.4         | <b>119.6</b>   | 224.8   | 151.2           | <b>565.4</b>   | 1650.5  |
|               | C <sub>veg</sub>    | 486.6        | <b>1353</b>    | 5296    | 1031.7          | <b>3573.8</b>  | 43899.1 | 489.2        | <b>1398.3</b>  | 6006.5  | 1037.8          | <b>3588.3</b>  | 43949.5 |
|               | C <sub>dom</sub>    | 7843.5       | <b>18749.7</b> | 36056.9 | 9082            | <b>20946.8</b> | 50601.3 | 10329.3      | <b>24489.4</b> | 47506.6 | 11906           | <b>27079.1</b> | 60657.6 |
|               | C <sub>tot</sub>    | 9183.9       | <b>20377.7</b> | 39553.4 | 11877.9         | <b>26398.7</b> | 86233.1 | 11737.3      | <b>26276.1</b> | 51209.8 | 14966.5         | <b>33140.4</b> | 93666.2 |
| Transit times | TT <sub>photo</sub> | 0.9          | <b>1.4</b>     | 2.4     | 2.9             | <b>10.9</b>    | 61      | 0.9          | <b>1.4</b>     | 2.4     | 2.9             | <b>10.7</b>    | 58.5    |
|               | TT <sub>veg</sub>   | 1.6          | <b>4.2</b>     | 16.5    | 3.1             | <b>10.3</b>    | 46      | 1.6          | <b>4.2</b>     | 16.2    | 3.1             | <b>10.2</b>    | 45.9    |
|               | TT <sub>dom</sub>   | 10           | <b>106.7</b>   | 724     | 12.2            | <b>126.4</b>   | 625.2   | 10.2         | <b>133.9</b>   | 897.6   | 12.4            | <b>154.8</b>   | 792.6   |
|               | TT <sub>tot</sub>   | 12           | <b>120</b>     | 933.5   | 19.4            | <b>212</b>     | 1692.2  | 12.1         | <b>150.8</b>   | 1139.7  | 18.9            | <b>243</b>     | 1878.7  |
